# Supplementary material
Source: PubMed Central journal article supplement (PMC5746343)
Supplement: NIHMS856688-supplement-Supplemental_Material.pdf [file NIHMS856688-supplement-Supplemental_Material.pdf]

## **SUPPLEMENTAL MATERIAL**

**Supplementary Table. Regression Results—CABG 60-Day Readmission and ED Revisit.**

|                                                      | Readmission     |                 |                 |                  |                  | ED Revisit      |                 |                 |                  |                  |
|------------------------------------------------------|-----------------|-----------------|-----------------|------------------|------------------|-----------------|-----------------|-----------------|------------------|------------------|
|                                                      | Main Model      | 30-Day Window   | 90-Day Window   | Emergent Surgery | Survival >3 Days | Main Model      | 30-Day Window   | 90-Day Window   | Emergent Surgery | Survival >3 Days |
| <b>Patient variables</b>                             |                 |                 |                 |                  |                  |                 |                 |                 |                  |                  |
| Proportion of patients from outside the CBSA         | 0.12+ (0.06)    | 0.15* (0.07)    | 0.11+ (0.06)    | 0.11+ (0.06)     | 0.12+ (0.06)     | 0.14* (0.06)    | 0.15* (0.07)    | 0.12* (0.06)    | 0.14* (0.06)     | 0.14* (0.06)     |
| Charlson score (mean)                                | 0.00 (0.03)     | 0.03 (0.03)     | 0.01 (0.02)     | 0.02 (0.03)      | 0.01 (0.03)      | 0.00 (0.02)     | 0.01 (0.03)     | 0.01 (0.02)     | 0.02 (0.02)      | 0.01 (0.02)      |
| Proportion surviving >3 days post-surgery            |                 |                 |                 |                  | -0.38+ (0.21)    |                 |                 |                 |                  | -0.29 (0.19)     |
| Proportion requiring emergent surgery                |                 |                 |                 | -0.19*** (0.06)  |                  |                 |                 |                 | -0.20*** (0.06)  |                  |
| Proportion living below federal poverty line (mean)† | -2.95*** (0.41) | -2.68*** (0.43) | -3.05*** (0.41) | -2.99*** (0.41)  | -2.94*** (0.41)  | -2.46*** (0.40) | -2.33*** (0.42) | -2.54*** (0.40) | -2.51*** (0.40)  | -2.46*** (0.40)  |
| Proportion with a bachelor's degree (mean)†          | -1.61*** (0.41) | -1.60*** (0.42) | -1.62*** (0.41) | -1.66*** (0.41)  | -1.61*** (0.41)  | -1.25** (0.40)  | -1.49*** (0.42) | -1.29** (0.40)  | -1.30** (0.40)   | -1.25** (0.40)   |
| Proportion living in a rural area (mean)†            | 0.07 (0.09)     | 0.03 (0.10)     | 0.11 (0.09)     | 0.07 (0.09)      | 0.06 (0.10)      | 0.27** (0.09)   | 0.24* (0.10)    | 0.28** (0.09)   | 0.27** (0.09)    | 0.27** (0.09)    |
| <b>Hospital variables</b>                            |                 |                 |                 |                  |                  |                 |                 |                 |                  |                  |
| Number of patients                                   | 0.01*** (0.00)  | 0.01*** (0.00)  | 0.01*** (0.00)  | 0.01*** (0.00)   | 0.01*** (0.00)   | 0.01*** (0.00)  | 0.01*** (0.00)  | 0.01*** (0.00)  | 0.01*** (0.00)   | 0.01*** (0.00)   |
| Number of physicians                                 | 0.00 (0.00)     | 0.00 (0.00)     | 0.00 (0.00)     | 0.00 (0.00)      | 0.00 (0.00)      | 0.00 (0.00)     | 0.00 (0.00)     | 0.00 (0.00)     | 0.00 (0.00)      | 0.00 (0.00)      |
| Academic hospital                                    | 0.06* (0.03)    | 0.04 (0.03)     | 0.07** (0.03)   | 0.07* (0.03)     | 0.06* (0.03)     | 0.04 (0.03)     | 0.01 (0.03)     | 0.04+ (0.03)    | 0.04 (0.03)      | 0.04 (0.03)      |
| Total resident population (in thousands, log)        | -0.02 (0.03)    | -0.01 (0.04)    | -0.03 (0.03)    | -0.02 (0.03)     | -0.02 (0.03)     | 0.03 (0.03)     | 0.05 (0.04)     | 0.03 (0.03)     | 0.03 (0.03)      | 0.03 (0.03)      |
| Total black population (in thousands, log)           | 0.05*** (0.01)  | 0.05*** (0.01)  | 0.05*** (0.01)  | 0.05*** (0.01)   | 0.05*** (0.01)   | 0.02 (0.01)     | 0.01 (0.01)     | 0.02 (0.01)     | 0.02 (0.01)      | 0.02 (0.01)      |
| Total Hispanic population (in thousands, log)        | -0.07*** (0.02) | -0.07*** (0.02) | -0.07*** (0.02) | -0.07*** (0.02)  | -0.07*** (0.02)  | -0.08*** (0.02) | -0.08*** (0.02) | -0.09*** (0.02) | -0.08*** (0.02)  | -0.08*** (0.02)  |
| Acute care hospital beds per 1,000 residents         | -0.01 (0.03)    | -0.01 (0.03)    | -0.01 (0.03)    | -0.01 (0.03)     | -0.01 (0.03)     | -0.07** (0.03)  | -0.08** (0.03)  | -0.07** (0.03)  | -0.07** (0.03)   | -0.07** (0.03)   |
| PCPs per 100,000 residents                           | -0.00* (0.00)   | -0.00+ (0.00)   | -0.00* (0.00)   | -0.00* (0.00)    | -0.00* (0.00)    | 0.00 (0.00)     | 0.00 (0.00)     | 0.00 (0.00)     | 0.00 (0.00)      | 0.00 (0.00)      |
| Medical specialists per 100,000 residents            | 0.00 (0.00)     | 0.00 (0.00)     | 0.00 (0.00)     | 0.00 (0.00)      | 0.00 (0.00)      | 0.00 (0.00)     | 0.00 (0.00)     | 0.00 (0.00)     | 0.00 (0.00)      | 0.00 (0.00)      |
| Surgeons per 100,000 residents                       | 0.00 (0.00)     | 0.00 (0.00)     | 0.00 (0.00)     | 0.00 (0.00)      | 0.00 (0.00)      | 0.00 (0.00)     | 0.00 (0.00)     | 0.00 (0.00)     | 0.00 (0.00)      | 0.00 (0.00)      |
| <b>Network variables</b>                             |                 |                 |                 |                  |                  |                 |                 |                 |                  |                  |
| Teamwork                                             | -1.49*** (0.18) | -1.45*** (0.18) | -1.47*** (0.17) | -1.50*** (0.17)  | -1.50*** (0.18)  | -1.51*** (0.17) | -1.54*** (0.18) | -1.44*** (0.17) | -1.51*** (0.17)  | -1.51*** (0.17)  |
| <b>Other variables</b>                               |                 |                 |                 |                  |                  |                 |                 |                 |                  |                  |
| Year = 2009                                          | -0.16*** (0.02) | -0.17*** (0.02) | -0.15*** (0.02) | -0.16*** (0.02)  | -0.16*** (0.02)  | -0.11*** (0.02) | -0.12*** (0.02) | -0.11*** (0.02) | -0.12*** (0.02)  | -0.11*** (0.02)  |
| Year = 2010                                          | -0.37*** (0.02) | -0.39*** (0.02) | -0.39*** (0.02) | -0.38*** (0.02)  | -0.37*** (0.02)  | -0.31*** (0.02) | -0.32*** (0.02) | -0.33*** (0.02) | -0.32*** (0.02)  | -0.31*** (0.02)  |
| Imputed                                              | -2.59*** (0.34) | -2.73*** (0.40) | -2.34*** (0.29) | -2.62*** (0.35)  | -2.57*** (0.34)  | -2.18*** (0.27) | -2.31*** (0.29) | -2.13*** (0.25) | -2.21*** (0.27)  | -2.17*** (0.27)  |
| Constant                                             | 4.11*** (0.34)  | 3.93*** (0.35)  | 4.17*** (0.33)  | 4.21*** (0.34)   | 4.13*** (0.34)   | 3.88*** (0.33)  | 3.76*** (0.34)  | 3.81*** (0.33)  | 3.98*** (0.33)   | 3.89*** (0.33)   |
| Observations (Hospitals X Year)                      | 3339.00         | 3339.00         | 3339.00         | 3339.00          | 3339.00          | 3339.00         | 3339.00         | 3339.00         | 3339.00          | 3339.00          |
| Hospitals                                            | 1141.00         | 1141.00         | 1141.00         | 1141.00          | 1141.00          | 1141.00         | 1141.00         | 1141.00         | 1141.00          | 1141.00          |
| Log likelihood                                       | -9632           | -8905.5         | -9994.3         | -9626.2          | -9630            | -10407          | -9703           | -10772.7        | -10400.7         | -10406           |

Standard errors in parentheses

+ p<0.1, \* p<0.05, \*\* p<0.01, \*\*\* p<0.001

† Estimated using levels found in patients' home zip codes

Abbreviations: CABG, coronary artery bypass grafting; CBSA, core-based statistical area; ED, emergency department; PCP, primary care physician
